# Supplementary material
Source: Research Square preprint supplement (doi:10.21203/rs.3.rs-9926500/v1)
Supplement: Supplementary file 1 [file 80cda6378ef5670c5b5838ea.pdf]

# Supplementary Material: Benchmark melting behavior of rhodium under megabar pressures

Jose Luis Rodrigo-Ramon<sup>1\*</sup>, Samuel R. Baty<sup>4</sup>,  
Leonid Burakovsky<sup>4</sup>, Pablo Botella<sup>1</sup>, Anna Pakhomova<sup>2</sup>,  
Egor Koemets<sup>3</sup>, Bjorn Wehinger<sup>2</sup>, Daniel Errandonea<sup>1</sup>,  
Simone Anzellini<sup>1</sup>

<sup>1\*</sup>Department of Applied Physics - Institute of Materials Science, Matter at High Pressure (MALTA) Consolider Team, University of Valencia, , Burjassot, Spain.

<sup>2</sup> European Synchrotron Radiation Facility, Grenoble, France.

<sup>3</sup> Diamond Light Source Ltd., Harwell Science and Innovation Campus, Didcot, Oxfordshire, UK.

<sup>4</sup> Theoretical Divisions, Los Alamos National Laboratory, Los Alamos, New Mexico, 87545 NM, United States of America.

\*Corresponding author(s). E-mail(s): [jose.l.rodrido@uv.es](mailto:jose.l.rodrido@uv.es);

# 1 HIGH TEMPERATURE LASER HEATING OF Rh

| $P_{\text{MgO}}$<br>(GPa) | T<br>(K) | $\sigma_T$<br>(K) | $a_{\text{Rh-fcc}}$<br>(Å) | $a_{\text{MgO}}$<br>(Å) | $P_{\text{MgO}}$<br>(GPa) | T<br>(K) | $\sigma_T$<br>(K) | $a_{\text{Rh-fcc}}$<br>(Å) | $a_{\text{MgO}}$<br>(Å) |
|---------------------------|----------|-------------------|----------------------------|-------------------------|---------------------------|----------|-------------------|----------------------------|-------------------------|
| 13(2)                     | 1362     | 150               | 3.770(2)                   | 4.162(2)                | 21(2)                     | 1837     | 172               | 3.764(2)                   | 4.127(2)                |
| 13(2)                     | 1367     | 150               | 3.770(2)                   | 4.163(2)                | 23(2)                     | 1848     | 136               | 3.751(2)                   | 4.114(2)                |
| 22(2)                     | 1696     | 278               | 3.750(2)                   | 4.115(2)                | 21(2)                     | 1861     | 194               | 3.765(2)                   | 4.127(2)                |
| 22(2)                     | 1700     | 311               | 3.750(2)                   | 4.115(2)                | 23(2)                     | 1881     | 140               | 3.751(2)                   | 4.114(2)                |
| 13(2)                     | 1716     | 133               | 3.781(2)                   | 4.176(2)                | 20(2)                     | 1883     | 299               | 3.771(2)                   | 4.133(2)                |
| 22(2)                     | 1717     | 156               | 3.750(2)                   | 4.115(2)                | 23(2)                     | 1889     | 233               | 3.748(2)                   | 4.113(2)                |
| 22(2)                     | 1722     | 310               | 3.750(2)                   | 4.115(2)                | 19(3)                     | 1990     | 237               | 3.779(2)                   | 4.144(2)                |
| 11(2)                     | 1723     | 215               | 3.789(2)                   | 4.193(2)                | 20(3)                     | 2056     | 122               | 3.780(2)                   | 4.143(2)                |
| 12(2)                     | 1739     | 222               | 3.793(2)                   | 4.187(2)                | 18(3)                     | 2108     | 151               | 3.781(2)                   | 4.156(2)                |
| 22(2)                     | 1740     | 400               | 3.750(2)                   | 4.115(2)                | 20(3)                     | 2110     | 121               | 3.788(2)                   | 4.145(2)                |
| 12(2)                     | 1758     | 196               | 3.797(2)                   | 4.185(2)                | 20(3)                     | 2114     | 142               | 3.771(2)                   | 4.144(2)                |
| 11(2)                     | 1767     | 153               | 3.780(2)                   | 4.196(2)                | 20(3)                     | 2131     | 220               | 3.769(2)                   | 4.143(2)                |
| 11(2)                     | 1769     | 144               | 3.780(2)                   | 4.196(2)                | 21(3)                     | 2134     | 170               | 3.779(2)                   | 4.142(2)                |
| 13(2)                     | 1778     | 217               | 3.795(2)                   | 4.183(2)                | 20(3)                     | 2135     | 220               | 3.769(2)                   | 4.146(2)                |
| 13(2)                     | 1780     | 200               | 3.792(2)                   | 4.183(2)                | 20(3)                     | 2138     | 220               | 3.776(2)                   | 4.146(2)                |
| 13(2)                     | 1781     | 222               | 3.790(2)                   | 4.179(2)                | 20(3)                     | 2139     | 146               | 3.782(2)                   | 4.143(2)                |
| 22(2)                     | 1793     | 274               | 3.748(2)                   | 4.027(2)                | 20(3)                     | 2140     | 137               | 3.783(2)                   | 4.144(2)                |
| 13(2)                     | 1805     | 230               | 3.794(2)                   | 4.179(2)                | 22(3)                     | 2143     | 141               | 3.768(2)                   | 4.135(2)                |
| 23(2)                     | 1807     | 114               | 3.750(2)                   | 4.115(2)                | 19(3)                     | 2144     | 134               | 3.779(2)                   | 4.154(2)                |
| 23(2)                     | 1808     | 131               | 3.750(2)                   | 4.115(2)                | 21(3)                     | 2163     | 200               | 3.781(2)                   | 4.142(2)                |
| 21(2)                     | 1819     | 196               | 3.761(2)                   | 4.126(2)                | 21(3)                     | 2234     | 220               | 3.775(2)                   | 4.147(2)                |
| 21(2)                     | 1824     | 272               | 3.760(2)                   | 4.123(2)                | 15(3)                     | 2316     | 200               | 3.802(2)                   | 4.194(2)                |
| 37(2)                     | 1833     | 226               | 3.706(2)                   | 4.034(2)                | 18(4)                     | 2701     | 307               | liquid                     | 4.188(2)                |
| 37(2)                     | 1834     | 230               | 3.706(2)                   | 4.034(2)                | 16(3)                     | 2500     | 250               | liquid                     | 4.198(2)                |
| 37(2)                     | 1834     | 220               | 3.705(2)                   | 4.033(2)                | 21(5)                     | 3446     | 310               | liquid                     | 4.200(2)                |

**Table S1:** P–V–T data for Rh measured using MgO as the pressure-transmitting medium (PTM).  $a_{\text{fcc}}$  (Å) represents the measured lattice parameter of Rh.  $P_{\text{MgO}}$  corresponds to the pressure obtained from the MgO unit-cell parameter and the temperature measured using the thermal equation of state of MgO from [1].  $T$  (K) and  $\sigma_T$  (K) denote the measured temperature and its uncertainty, respectively, obtained by spectral radiometry from the sample. Uncertainties in pressure and lattice parameters are given in parentheses for each measurement. For the lattice parameters we have evaluated an error of the order of 0.002 (Å) that agrees with the typical resolution associated with synchrotron XRD measurements.

| $P_{\text{MgO}}$<br>(GPa) | T<br>(K) | $\sigma_T$<br>(K) | $a_{\text{Rh-fcc}}$<br>(Å) | $a_{\text{MgO}}$<br>(Å) | $P_{\text{MgO}}$<br>(GPa) | T<br>(K) | $\sigma_T$<br>(K) | $a_{\text{Rh-fcc}}$<br>(Å) | $a_{\text{MgO}}$<br>(Å) |
|---------------------------|----------|-------------------|----------------------------|-------------------------|---------------------------|----------|-------------------|----------------------------|-------------------------|
| 21.0(1.1)                 | 1284     | 162               | 3.746(2)                   | 3.369(2)                | 20.0(1.8)                 | 1876     | 255               | 3.760(2)                   | 3.428(2)                |
| 22.0(1.2)                 | 1360     | 135               | 3.745(2)                   | 3.370(2)                | 39.0(1.8)                 | 1877     | 244               | 3.692(2)                   | 3.225(2)                |
| 21.0(1.2)                 | 1382     | 124               | 3.747(2)                   | 3.371(2)                | 46.0(1.8)                 | 1880     | 200               | 3.685(2)                   | 3.179(2)                |
| 58.0(1.2)                 | 1386     | 261               | 3.630(2)                   | 3.099(2)                | 34.0(1.8)                 | 1883     | 123               | 3.709(2)                   | 3.265(2)                |
| 58.0(1.2)                 | 1403     | 208               | 3.630(2)                   | 3.098(2)                | 39.0(1.8)                 | 1883     | 330               | 3.690(2)                   | 3.226(2)                |
| 57.0(1.2)                 | 1404     | 240               | 3.636(2)                   | 3.107(2)                | 39.0(1.8)                 | 1896     | 106               | 3.692(2)                   | 3.224(2)                |
| 57.0(1.2)                 | 1405     | 250               | 3.636(2)                   | 3.107(2)                | 92.0(1.8)                 | 1902     | 133               | 3.571(2)                   | 2.979(2)                |
| 34.0(1.3)                 | 1430     | 190               | 3.697(2)                   | 3.252(2)                | 39.0(1.8)                 | 1904     | 188               | 3.692(2)                   | 3.226(2)                |
| 39.0(1.3)                 | 1431     | 112               | 3.681(2)                   | 3.209(2)                | 39.0(1.8)                 | 1905     | 112               | 3.692(2)                   | 3.224(2)                |
| 34.0(1.3)                 | 1439     | 163               | 3.697(2)                   | 3.252(2)                | 37.0(1.8)                 | 1907     | 133               | 3.693(2)                   | 3.239(2)                |
| 59.0(1.3)                 | 1447     | 250               | 3.631(2)                   | 3.099(2)                | 60.0(1.8)                 | 1908     | 196               | 3.635(2)                   | 3.103(2)                |
| 39.0(1.3)                 | 1448     | 131               | 3.681(2)                   | 3.210(2)                | 20.0(1.8)                 | 1913     | 236               | 3.762(2)                   | 3.430(2)                |
| 39.0(1.3)                 | 1452     | 175               | 3.680(2)                   | 3.209(2)                | 63.0(1.8)                 | 1914     | 165               | 3.628(2)                   | 3.087(2)                |
| 34.0(1.3)                 | 1452     | 132               | 3.697(2)                   | 3.253(2)                | 36.0(1.8)                 | 1919     | 221               | 3.695(2)                   | 3.248(2)                |
| 91.0(1.3)                 | 1454     | 114               | 3.565(2)                   | 2.977(2)                | 39.0(1.8)                 | 1921     | 141               | 3.698(2)                   | 3.225(2)                |
| 21.0(1.3)                 | 1456     | 150               | 3.754(2)                   | 3.381(2)                | 39.0(1.8)                 | 1926     | 103               | 3.693(2)                   | 3.224(2)                |
| 41.0(1.3)                 | 1459     | 211               | 3.678(2)                   | 3.197(2)                | 20.0(1.8)                 | 1932     | 129               | 3.764(2)                   | 3.433(2)                |
| 38.0(1.3)                 | 1462     | 225               | 3.686(2)                   | 3.221(2)                | 26.0(1.8)                 | 1936     | 264               | 3.724(2)                   | 3.343(2)                |
| 38.0(1.3)                 | 1464     | 249               | 3.687(2)                   | 3.221(2)                | 58.0(1.8)                 | 1936     | 202               | 3.646(2)                   | 3.114(2)                |
| 41.0(1.3)                 | 1467     | 190               | 3.677(2)                   | 3.196(2)                | 92.0(1.8)                 | 1936     | 116               | 3.570(2)                   | 2.981(2)                |
| 50.0(1.3)                 | 1468     | 170               | 3.655(2)                   | 3.144(2)                | 89.0(1.8)                 | 1942     | 140               | 3.581(2)                   | 2.990(2)                |
| 50.0(1.3)                 | 1470     | 130               | 3.657(2)                   | 3.145(2)                | 34.0(1.8)                 | 1949     | 134               | 3.714(2)                   | 3.267(2)                |
| 38.0(1.3)                 | 1473     | 227               | 3.686(2)                   | 3.221(2)                | 41.0(1.8)                 | 1949     | 192               | 3.696(2)                   | 3.211(2)                |
| 21.0(1.3)                 | 1476     | 161               | 3.745(2)                   | 3.381(2)                | 39.0(1.8)                 | 1951     | 325               | 3.692(2)                   | 3.227(2)                |
| 61.0(1.3)                 | 1478     | 190               | 3.626(2)                   | 3.087(2)                | 36.0(1.9)                 | 1955     | 221               | 3.699(2)                   | 3.251(2)                |
| 38.0(1.3)                 | 1478     | 260               | 3.686(2)                   | 3.221(2)                | 63.0(1.9)                 | 1955     | 150               | 3.626(2)                   | 3.090(2)                |
| 44.0(1.3)                 | 1479     | 160               | 3.677(2)                   | 3.176(2)                | 39.0(1.9)                 | 1959     | 112               | 3.693(2)                   | 3.225(2)                |
| 60.0(1.3)                 | 1485     | 150               | 3.626(2)                   | 3.094(2)                | 26.0(1.9)                 | 1966     | 263               | 3.723(2)                   | 3.344(2)                |
| 21.0(1.3)                 | 1488     | 147               | 3.749(2)                   | 3.384(2)                | 92.0(1.9)                 | 1966     | 115               | 3.569(2)                   | 2.981(2)                |
| 38.0(1.3)                 | 1492     | 250               | 3.685(2)                   | 3.220(2)                | 37.0(1.9)                 | 1972     | 168               | 3.693(2)                   | 3.241(2)                |
| 38.0(1.3)                 | 1494     | 197               | 3.686(2)                   | 3.220(2)                | 26.0(1.9)                 | 1973     | 233               | 3.726(2)                   | 3.345(2)                |
| 44.0(1.3)                 | 1499     | 150               | 3.675(2)                   | 3.177(2)                | 46.0(1.9)                 | 1977     | 200               | 3.688(2)                   | 3.181(2)                |
| 38.0(1.3)                 | 1501     | 250               | 3.685(2)                   | 3.219(2)                | 93.0(1.9)                 | 1978     | 140               | 3.568(2)                   | 2.979(2)                |
| 34.0(1.3)                 | 1501     | 142               | 3.697(2)                   | 3.253(2)                | 39.0(1.9)                 | 1978     | 280               | 3.694(2)                   | 3.228(2)                |
| 91.0(1.3)                 | 1505     | 170               | 3.567(2)                   | 2.977(2)                | 60.0(1.9)                 | 1981     | 204               | 3.642(2)                   | 3.105(2)                |
| 50.0(1.4)                 | 1507     | 170               | 3.659(2)                   | 3.146(2)                | 50.0(1.9)                 | 1985     | 153               | 3.665(2)                   | 3.156(2)                |
| 38.0(1.4)                 | 1510     | 286               | 3.685(2)                   | 3.219(2)                | 36.0(1.9)                 | 1991     | 221               | 3.697(2)                   | 3.249(2)                |
| 41.0(1.4)                 | 1513     | 180               | 3.679(2)                   | 3.199(2)                | 41.0(1.9)                 | 1994     | 257               | 3.679(2)                   | 3.212(2)                |
| 44.0(1.4)                 | 1514     | 150               | 3.675(2)                   | 3.177(2)                | 40.0(1.9)                 | 1996     | 165               | 3.699(2)                   | 3.223(2)                |
| 63.0(1.4)                 | 1516     | 216               | 3.621(2)                   | 3.081(2)                | 26.0(1.9)                 | 1997     | 251               | 3.723(2)                   | 3.345(2)                |
| 19.0(1.4)                 | 1524     | 181               | 3.750(2)                   | 3.406(2)                | 39.0(1.9)                 | 2004     | 163               | 3.694(2)                   | 3.228(2)                |
| 38.0(1.4)                 | 1532     | 275               | 3.685(2)                   | 3.220(2)                | 38.0(1.9)                 | 2016     | 194               | 3.688(2)                   | 3.239(2)                |

|           |      |     |          |          |           |      |      |          |          |
|-----------|------|-----|----------|----------|-----------|------|------|----------|----------|
| 38.0(1.4) | 1532 | 270 | 3.685(2) | 3.220(2) | 40.0(1.9) | 2026 | 148  | 3.696(2) | 3.220(2) |
| 38.0(1.4) | 1533 | 216 | 3.685(2) | 3.220(2) | 36.0(1.9) | 2026 | 221  | 3.699(2) | 3.250(2) |
| 88.0(1.4) | 1539 | 180 | 3.577(2) | 2.989(2) | 39.0(1.9) | 2027 | 285  | 3.694(2) | 3.229(2) |
| 59.0(1.4) | 1539 | 215 | 3.632(2) | 3.099(2) | 34.0(1.9) | 2027 | 155  | 3.718(2) | 3.269(2) |
| 21.0(1.4) | 1545 | 115 | 3.750(2) | 3.392(2) | 39.0(1.9) | 2028 | 160  | 3.695(2) | 3.230(2) |
| 50.0(1.4) | 1546 | 152 | 3.659(2) | 3.146(2) | 89.0(1.9) | 2030 | 184  | 3.582(2) | 2.990(2) |
| 65.0(1.4) | 1546 | 150 | 3.615(2) | 3.074(2) | 61.0(1.9) | 2031 | 170  | 3.637(2) | 3.100(2) |
| 38.0(1.4) | 1547 | 247 | 3.688(2) | 3.223(2) | 26.0(1.9) | 2034 | 232  | 3.730(2) | 3.348(2) |
| 45.0(1.4) | 1549 | 135 | 3.678(2) | 3.177(2) | 37(2)     | 2045 | 160  | 3.693(2) | 3.242(2) |
| 34.0(1.4) | 1551 | 134 | 3.697(2) | 3.255(2) | 37(2)     | 2048 | 221  | 3.697(2) | 3.250(2) |
| 39.0(1.4) | 1552 | 113 | 3.687(2) | 3.212(2) | 42(2)     | 2053 | 200  | 3.697(2) | 3.209(2) |
| 60.0(1.4) | 1555 | 150 | 3.625(2) | 3.094(2) | 62(2)     | 2075 | 93   | 3.639(2) | 3.094(2) |
| 50.0(1.4) | 1555 | 200 | 3.652(2) | 3.143(2) | 50(2)     | 2079 | 200  | 3.665(2) | 3.158(2) |
| 41.0(1.4) | 1557 | 191 | 3.680(2) | 3.201(2) | 27(2)     | 2087 | 211  | 3.729(2) | 3.348(2) |
| 60.0(1.4) | 1571 | 150 | 3.627(2) | 3.094(2) | 60(2)     | 2090 | 211  | 3.643(2) | 3.107(2) |
| 57.0(1.4) | 1572 | 200 | 3.637(2) | 3.108(2) | 37(2)     | 2092 | 200  | 3.699(2) | 3.252(2) |
| 21.0(1.4) | 1578 | 150 | 3.756(2) | 3.385(2) | 39(2)     | 2093 | 165  | 3.698(2) | 3.229(2) |
| 63.0(1.4) | 1578 | 176 | 3.623(2) | 3.082(2) | 41(2)     | 2105 | 165  | 3.700(2) | 3.219(2) |
| 34.0(1.4) | 1588 | 126 | 3.698(2) | 3.257(2) | 93(2)     | 2105 | 147  | 3.570(2) | 2.981(2) |
| 91.0(1.4) | 1593 | 151 | 3.566(2) | 2.978(2) | 62(2)     | 2107 | 200  | 3.633(2) | 3.095(2) |
| 65.0(1.4) | 1593 | 150 | 3.615(2) | 3.074(2) | 39(2)     | 2107 | 195  | 3.697(2) | 3.231(2) |
| 38.0(1.5) | 1602 | 172 | 3.689(2) | 3.223(2) | 39(2)     | 2111 | 245  | 3.692(2) | 3.230(2) |
| 89.0(1.5) | 1611 | 110 | 3.576(2) | 2.986(2) | 62(2)     | 2113 | 162  | 3.640(2) | 3.095(2) |
| 44.0(1.5) | 1615 | 186 | 3.672(2) | 3.183(2) | 20(2)     | 2129 | 122  | 3.773(2) | 3.439(2) |
| 50.0(1.5) | 1617 | 170 | 3.659(2) | 3.148(2) | 27(2)     | 2131 | 211  | 3.730(2) | 3.349(2) |
| 65.0(1.5) | 1617 | 162 | 3.616(2) | 3.074(2) | 37(2)     | 2144 | 200  | 3.699(2) | 3.254(2) |
| 45.0(1.5) | 1627 | 190 | 3.680(2) | 3.177(2) | 36(2)     | 2154 | 353  | 3.699(2) | 3.257(2) |
| 38.0(1.5) | 1628 | 142 | 3.689(2) | 3.223(2) | 63(2)     | 2177 | 196  | 3.638(2) | 3.094(2) |
| 60.0(1.5) | 1630 | 133 | 3.628(2) | 3.094(2) | 38(2)     | 2178 | 170  | 3.694(2) | 3.246(2) |
| 38.0(1.5) | 1640 | 124 | 3.689(2) | 3.224(2) | 58(2)     | 2182 | 300  | 3.648(2) | 3.118(2) |
| 91.0(1.5) | 1641 | 130 | 3.571(2) | 2.978(2) | 37(2)     | 2189 | 200  | 3.700(2) | 3.254(2) |
| 21.0(1.5) | 1649 | 150 | 3.759(2) | 3.388(2) | 39(2)     | 2194 | 231  | 3.698(2) | 3.236(2) |
| 41.0(1.5) | 1651 | 199 | 3.682(2) | 3.204(2) | 33(2)     | 2203 | 171  | 3.722(2) | 3.284(2) |
| 38.0(1.5) | 1651 | 202 | 3.689(2) | 3.223(2) | 61(2)     | 2240 | 250  | 3.635(2) | 3.103(2) |
| 34.0(1.5) | 1660 | 132 | 3.698(2) | 3.258(2) | 63(2)     | 2246 | 250  | 3.638(2) | 3.096(2) |
| 38.0(1.5) | 1660 | 189 | 3.688(2) | 3.223(2) | 27(2)     | 2256 | 211  | 3.737(2) | 3.352(2) |
| 59.0(1.5) | 1660 | 152 | 3.635(2) | 3.100(2) | 27(2)     | 2275 | 211  | 3.719(2) | 3.351(2) |
| 45.0(1.5) | 1662 | 280 | 3.674(2) | 3.179(2) | 27(2)     | 2288 | 211  | 3.733(2) | 3.354(2) |
| 89.0(1.5) | 1666 | 120 | 3.576(2) | 2.986(2) | 93(2)     | 2295 | 96.9 | 3.573(2) | 2.984(2) |
| 22.0(1.5) | 1669 | 163 | 3.756(2) | 3.384(2) | 27(2)     | 2299 | 211  | 3.737(2) | 3.353(2) |
| 50.0(1.5) | 1681 | 150 | 3.659(2) | 3.150(2) | 60(2)     | 2318 | 247  | 3.646(2) | 3.110(2) |
| 38.0(1.5) | 1683 | 119 | 3.689(2) | 3.223(2) | 37(2)     | 2325 | 163  | 3.697(2) | 3.254(2) |
| 40.0(1.5) | 1684 | 126 | 3.692(2) | 3.215(2) | 63(2)     | 2328 | 200  | 3.633(2) | 3.098(2) |
| 34.0(1.6) | 1687 | 104 | 3.698(2) | 3.259(2) | 27(2)     | 2331 | 211  | 3.733(2) | 3.354(2) |
| 34.0(1.6) | 1700 | 117 | 3.697(2) | 3.259(2) | 36(2)     | 2332 | 212  | 3.702(2) | 3.262(2) |

|           |      |     |          |          |       |      |      |          |          |
|-----------|------|-----|----------|----------|-------|------|------|----------|----------|
| 65.0(1.6) | 1700 | 160 | 3.617(2) | 3.075(2) | 64(2) | 2335 | 414  | 3.637(2) | 3.092(2) |
| 38.0(1.6) | 1705 | 130 | 3.689(2) | 3.224(2) | 27(2) | 2335 | 211  | 3.737(2) | 3.354(2) |
| 92.0(1.6) | 1709 | 128 | 3.570(2) | 2.978(2) | 27(2) | 2336 | 211  | 3.735(2) | 3.354(2) |
| 63.0(1.6) | 1710 | 169 | 3.625(2) | 3.083(2) | 63(2) | 2345 | 300  | 3.636(2) | 3.096(2) |
| 45.0(1.6) | 1712 | 140 | 3.684(2) | 3.178(2) | 27(2) | 2346 | 211  | 3.735(2) | 3.355(2) |
| 62.0(1.6) | 1712 | 90  | 3.629(2) | 3.089(2) | 50(2) | 2355 | 200  | 3.667(2) | 3.163(2) |
| 59.0(1.6) | 1722 | 164 | 3.635(2) | 3.101(2) | 62(2) | 2360 | 150  | 3.637(2) | 3.103(2) |
| 22.0(1.6) | 1731 | 169 | 3.760(2) | 3.385(2) | 27(2) | 2363 | 211  | 3.735(2) | 3.355(2) |
| 22.0(1.6) | 1732 | 150 | 3.762(2) | 3.390(2) | 40(2) | 2374 | 200  | 3.700(2) | 3.237(2) |
| 34.0(1.6) | 1747 | 120 | 3.700(2) | 3.260(2) | 64(2) | 2388 | 207  | 3.634(2) | 3.093(2) |
| 89.0(1.6) | 1748 | 140 | 3.580(2) | 2.990(2) | 90(2) | 2399 | 178  | 3.582(2) | 2.994(2) |
| 50.0(1.6) | 1761 | 160 | 3.660(2) | 3.150(2) | 31(2) | 2411 | 150  | 3.724(2) | 3.313(2) |
| 34.0(1.6) | 1761 | 147 | 3.700(2) | 3.260(2) | 94(2) | 2413 | 200  | 3.571(2) | 2.982(2) |
| 92.0(1.6) | 1764 | 150 | 3.570(2) | 2.980(2) | 40(2) | 2416 | 325  | 3.702(2) | 3.236(2) |
| 38.0(1.6) | 1765 | 244 | 3.690(2) | 3.230(2) | 36(2) | 2420 | 230  | 3.706(2) | 3.266(2) |
| 36.0(1.6) | 1765 | 221 | 3.690(2) | 3.240(2) | 42(2) | 2441 | 195  | 3.702(2) | 3.223(2) |
| 41.0(1.6) | 1766 | 215 | 3.690(2) | 3.210(2) | 37(2) | 2450 | 216  | 3.702(2) | 3.265(2) |
| 92.0(1.6) | 1770 | 140 | 3.570(2) | 2.980(2) | 40(2) | 2461 | 200  | 3.699(2) | 3.236(2) |
| 36.0(1.7) | 1773 | 221 | 3.690(2) | 3.250(2) | 40(2) | 2461 | 167  | 3.701(2) | 3.239(2) |
| 26.0(1.7) | 1789 | 226 | 3.720(2) | 3.340(2) | 41(3) | 2496 | 299  | 3.704(2) | 3.235(2) |
| 26.0(1.7) | 1790 | 127 | 3.720(2) | 3.340(2) | 60(3) | 2505 | 300  | 3.649(2) | 3.114(2) |
| 26.0(1.7) | 1791 | 230 | 3.720(2) | 3.340(2) | 51(3) | 2515 | 243  | 3.678(2) | 3.166(2) |
| 39.0(1.7) | 1795 | 128 | 3.690(2) | 3.230(2) | 62(3) | 2553 | 200  | 3.633(2) | 3.104(2) |
| 26.0(1.7) | 1796 | 131 | 3.720(2) | 3.340(2) | 41(3) | 2558 | 185  | 3.704(2) | 3.230(2) |
| 38.0(1.7) | 1798 | 160 | 3.690(2) | 3.230(2) | 58(3) | 2570 | 352  | 3.653(2) | 3.127(2) |
| 26.0(1.7) | 1799 | 134 | 3.720(2) | 3.340(2) | 47(3) | 2576 | 230  | 3.687(2) | 3.189(2) |
| 60.0(1.7) | 1799 | 170 | 3.640(2) | 3.100(2) | 61(3) | 2583 | 272  | 3.651(2) | 3.114(2) |
| 39.0(1.7) | 1799 | 139 | 3.690(2) | 3.230(2) | 35(3) | 2635 | 223  | 3.732(2) | 3.282(2) |
| 36.0(1.7) | 1800 | 221 | 3.690(2) | 3.240(2) | 42(3) | 2636 | 200  | 3.705(2) | 3.226(2) |
| 39.0(1.7) | 1801 | 124 | 3.690(2) | 3.230(2) | 51(3) | 2645 | 260  | 3.669(2) | 3.167(2) |
| 39.0(1.7) | 1801 | 127 | 3.690(2) | 3.230(2) | 47(3) | 2685 | 220  | 3.692(2) | 3.193(2) |
| 41.0(1.7) | 1802 | 477 | 3.680(2) | 3.210(2) | 66(3) | 2694 | 200  | 3.627(2) | 3.090(2) |
| 41.0(1.7) | 1803 | 432 | 3.680(2) | 3.210(2) | 58(3) | 2705 | 297  | 3.654(2) | 3.129(2) |
| 39.0(1.7) | 1803 | 146 | 3.690(2) | 3.230(2) | 60(3) | 2728 | 300  | 3.652(2) | 3.118(2) |
| 38.0(1.7) | 1804 | 113 | 3.691(2) | 3.234(2) | 92(3) | 2737 | 171  | 3.574(2) | 2.992(2) |
| 37.0(1.7) | 1805 | 114 | 3.691(2) | 3.234(2) | 93(3) | 2737 | 159  | 3.576(2) | 2.987(2) |
| 41.0(1.7) | 1806 | 268 | 3.677(2) | 3.207(2) | 93(3) | 2750 | 69.6 | 3.583(2) | 2.989(2) |
| 38.0(1.7) | 1807 | 137 | 3.690(2) | 3.233(2) | 38(3) | 2786 | 200  | 3.704(2) | 3.270(2) |
| 26.0(1.7) | 1808 | 139 | 3.725(2) | 3.340(2) | 68(3) | 2786 | 182  | 3.630(2) | 3.084(2) |
| 38.0(1.7) | 1808 | 138 | 3.690(2) | 3.234(2) | 41(3) | 2793 | 269  | 3.702(2) | 3.239(2) |
| 26.0(1.7) | 1811 | 158 | 3.725(2) | 3.340(2) | 40(3) | 2810 | 300  | 3.704(2) | 3.246(2) |
| 41.0(1.7) | 1811 | 256 | 3.677(2) | 3.207(2) | 36(3) | 2817 | 285  | 3.734(2) | 3.286(2) |
| 39.0(1.7) | 1811 | 121 | 3.688(2) | 3.226(2) | 93(3) | 2862 | 288  | 3.582(2) | 2.992(2) |
| 26.0(1.7) | 1811 | 139 | 3.720(2) | 3.341(2) | 93(3) | 2880 | 227  | 3.576(2) | 2.990(2) |
| 41.0(1.7) | 1813 | 392 | 3.678(2) | 3.207(2) | 57(3) | 2882 | 340  | 3.652(2) | 3.139(2) |

|           |      |     |          |          |       |      |     |          |          |
|-----------|------|-----|----------|----------|-------|------|-----|----------|----------|
| 39.0(1.7) | 1813 | 166 | 3.691(2) | 3.225(2) | 52(3) | 2917 | 51  | 3.694(2) | 3.172(2) |
| 38.0(1.7) | 1814 | 128 | 3.689(2) | 3.232(2) | 93(3) | 2918 | 250 | 3.578(2) | 2.991(2) |
| 37.0(1.7) | 1815 | 155 | 3.691(2) | 3.235(2) | 90(3) | 2919 | 204 | 3.588(2) | 3.002(2) |
| 38.0(1.7) | 1818 | 117 | 3.688(2) | 3.227(2) | 94(3) | 2952 | 250 | 3.572(2) | 2.990(2) |
| 38.0(1.7) | 1818 | 137 | 3.689(2) | 3.232(2) | 41(3) | 2960 | 267 | 3.700(2) | 3.252(2) |
| 41.0(1.7) | 1819 | 290 | 3.677(2) | 3.207(2) | 93(3) | 3007 | 325 | 3.586(2) | 2.994(2) |
| 37.0(1.7) | 1820 | 149 | 3.692(2) | 3.236(2) | 63(3) | 3023 | 250 | 3.635(2) | 3.109(2) |
| 34.0(1.7) | 1820 | 133 | 3.709(2) | 3.264(2) | 41(3) | 3053 | 270 | 3.707(2) | 3.253(2) |
| 37.0(1.7) | 1820 | 148 | 3.691(2) | 3.235(2) | 62(3) | 3059 | 655 | 3.646(2) | 3.119(2) |
| 38.0(1.7) | 1822 | 135 | 3.689(2) | 3.232(2) | 42(3) | 3059 | 220 | 3.708(2) | 3.245(2) |
| 38.0(1.7) | 1823 | 146 | 3.688(2) | 3.231(2) | 43(3) | 3074 | 215 | 3.705(2) | 3.237(2) |
| 38.0(1.7) | 1824 | 145 | 3.689(2) | 3.231(2) | 95(3) | 3113 | 306 | 3.584(2) | 2.988(2) |
| 38.0(1.7) | 1825 | 146 | 3.688(2) | 3.230(2) | 41(3) | 3120 | 232 | 3.708(2) | 3.252(2) |
| 26.0(1.7) | 1825 | 382 | 3.721(2) | 3.342(2) | 60(3) | 3124 | 468 | 3.658(2) | 3.127(2) |
| 36.0(1.7) | 1829 | 221 | 3.688(2) | 3.244(2) | 93(3) | 3148 | 300 | 3.577(2) | 2.994(2) |
| 38.0(1.7) | 1830 | 139 | 3.688(2) | 3.229(2) | 95(3) | 3153 | 380 | 3.574(2) | 2.989(2) |
| 37.0(1.7) | 1831 | 256 | 3.683(2) | 3.235(2) | 95(3) | 3199 | 741 | 3.580(2) | 2.988(2) |
| 37.0(1.7) | 1832 | 221 | 3.685(2) | 3.236(2) | 92(3) | 3203 | 300 | 3.589(2) | 2.997(2) |
| 38.0(1.7) | 1833 | 140 | 3.687(2) | 3.228(2) | 94(3) | 3216 | 383 | 3.588(2) | 2.993(2) |
| 37.0(1.7) | 1833 | 254 | 3.685(2) | 3.237(2) | 94(3) | 3228 | 438 | 3.575(2) | 2.991(2) |
| 37.0(1.7) | 1833 | 287 | 3.685(2) | 3.237(2) | 41(3) | 3241 | 236 | 3.706(2) | 3.256(2) |
| 26.0(1.7) | 1834 | 164 | 3.726(2) | 3.341(2) | 95(3) | 3242 | 291 | 3.590(2) | 2.990(2) |
| 92.0(1.7) | 1837 | 135 | 3.571(2) | 2.979(2) | 94(3) | 3300 | 230 | 3.598(2) | 2.994(2) |
| 36.0(1.7) | 1838 | 221 | 3.692(2) | 3.246(2) | 94(3) | 3317 | 428 | 3.590(2) | 2.993(2) |
| 58.0(1.7) | 1838 | 222 | 3.641(2) | 3.112(2) | 94(3) | 3318 | 300 | 3.588(2) | 2.994(2) |
| 22.0(1.7) | 1838 | 172 | 3.767(2) | 3.397(2) | 91(3) | 3324 | 230 | 3.590(2) | 3.003(2) |
| 41.0(1.7) | 1839 | 385 | 3.677(2) | 3.208(2) | 66(3) | 3381 | 200 | 3.639(2) | 3.104(2) |
| 37.0(1.7) | 1840 | 221 | 3.685(2) | 3.238(2) | 93(4) | 3914 | 444 | 3.600(2) | 3.006(2) |
| 37.0(1.7) | 1842 | 221 | 3.685(2) | 3.238(2) | 94(4) | 3969 | 220 | 3.596(2) | 3.005(2) |
| 39.0(1.7) | 1842 | 116 | 3.692(2) | 3.225(2) | 94(4) | 4013 | 337 | 3.591(2) | 3.003(2) |
| 36.0(1.7) | 1843 | 221 | 3.687(2) | 3.244(2) | 93(4) | 4053 | 400 | 3.587(2) | 3.007(2) |
| 37.0(1.7) | 1847 | 221 | 3.685(2) | 3.239(2) | 96(4) | 4150 | 296 | 3.597(2) | 3.000(2) |
| 36.0(1.7) | 1847 | 221 | 3.692(2) | 3.246(2) | 95(4) | 4250 | 654 | 3.579(2) | 3.004(2) |
| 37.0(1.7) | 1848 | 221 | 3.685(2) | 3.238(2) | 93(5) | 4386 | 450 | 3.591(2) | 3.012(2) |
| 39.0(1.7) | 1849 | 144 | 3.698(2) | 3.227(2) | 60(4) | 3765 | 500 | liquid   | 3.105(2) |
| 26.0(1.7) | 1850 | 140 | 3.723(2) | 3.341(2) | 41(3) | 3247 | 261 | liquid   | 3.208(2) |
| 37.0(1.7) | 1852 | 221 | 3.685(2) | 3.239(2) | 41(3) | 3182 | 304 | liquid   | 3.209(2) |
| 37.0(1.7) | 1854 | 221 | 3.686(2) | 3.240(2) | 65(4) | 3851 | 200 | liquid   | 3.086(2) |
| 39.0(1.7) | 1857 | 232 | 3.688(2) | 3.226(2) | 20(3) | 2600 | 190 | liquid   | 3.397(2) |
| 89.0(1.8) | 1863 | 140 | 3.580(2) | 2.989(2) | 24(3) | 2741 | 234 | liquid   | 3.350(2) |
| 41.0(1.8) | 1864 | 195 | 3.694(2) | 3.209(2) | 33(3) | 3182 | 200 | liquid   | 3.264(2) |
| 26.0(1.8) | 1866 | 142 | 3.724(2) | 3.341(2) | 37(3) | 3146 | 260 | liquid   | 3.238(2) |
| 22.0(1.8) | 1866 | 150 | 3.767(2) | 3.391(2) | 43(3) | 3218 | 372 | liquid   | 3.192(2) |
| 50.0(1.8) | 1868 | 126 | 3.663(2) | 3.153(2) | 97(5) | 4700 | 500 | liquid   | 2.977(2) |
| 39.0(1.8) | 1869 | 100 | 3.692(2) | 3.223(2) | 98(6) | 5312 | 297 | liquid   | 2.977(2) |

|           |      |     |          |          |       |      |     |        |          |
|-----------|------|-----|----------|----------|-------|------|-----|--------|----------|
| 41.0(1.8) | 1876 | 352 | 3.678(2) | 3.209(2) | 94(5) | 5043 | 522 | liquid | 2.987(2) |
| 37.0(1.8) | 1876 | 172 | 3.692(2) | 3.237(2) |       |      |     |        |          |

**Table S2:** P–V–T data for Rh measured using KCl as the pressure-transmitting medium (PTM).  $a_{fcc}$  (Å) represents the measured lattice parameter of Rh.  $P_{KCl}$  corresponds to the pressure obtained from the KCl unit-cell parameter B2 phase and the temperature measured using the thermal equation of state of MgO from [1].  $T$  (K) and  $\sigma_T$  (K) denote the measured temperature and its uncertainty, respectively, obtained by spectral radiometry from the sample. Uncertainties in pressure and lattice parameters are given in parentheses for each measurement. For the lattice parameters we have evaluated an error of the order of 0.002 (Å) that agrees with the typical resolution associated with synchrotron XRD measurements.

## 2 CALCULATED EOS ISOTHERMS FOR Rh

| 298 K           |                 | 800 K           |                 | 2000 K          |                 | 3000 K          |                 | 4000 K          |                 |
|-----------------|-----------------|-----------------|-----------------|-----------------|-----------------|-----------------|-----------------|-----------------|-----------------|
| $P(\text{GPa})$ | $V(\text{\AA})$ |
| -0.15126        | 55.134          | -5.2776         | 57.13           | -5.2776         | 59.703          | -5.2776         | 62.74           | -5.2776         | 68.361          |
| 0.9754          | 54.889          | -4.0383         | 56.788          | -4.0383         | 59.234          | -4.0383         | 62.044          | -4.0383         | 66.793          |
| 2.1021          | 54.651          | -2.7989         | 56.46           | -2.7989         | 58.791          | -2.7989         | 61.41           | -2.7989         | 65.561          |
| 3.2287          | 54.42           | -1.5596         | 56.145          | -1.5596         | 58.372          | -1.5596         | 60.826          | -1.5596         | 64.532          |
| 4.3554          | 54.195          | -0.32026        | 55.842          | -0.32026        | 57.974          | -0.32026        | 60.284          | -0.32026        | 63.644          |
| 6.6087          | 53.763          | 2.1584          | 55.267          | 2.1584          | 57.233          | 2.1584          | 59.304          | 2.1584          | 62.15           |
| 7.7354          | 53.556          | 3.3977          | 54.994          | 3.3977          | 56.887          | 3.3977          | 58.857          | 3.3977          | 61.507          |
| 8.862           | 53.353          | 4.6371          | 54.729          | 4.6371          | 56.555          | 4.6371          | 58.435          | 4.6371          | 60.915          |
| 9.9887          | 53.155          | 5.8764          | 54.473          | 5.8764          | 56.236          | 5.8764          | 58.034          | 5.8764          | 60.367          |
| 13.369          | 52.587          | 9.5944          | 53.749          | 9.5944          | 55.349          | 9.5944          | 56.939          | 9.5944          | 58.927          |
| 14.495          | 52.406          | 10.834          | 53.521          | 10.834          | 55.073          | 10.834          | 56.605          | 10.834          | 58.5            |
| 17.875          | 51.886          | 14.552          | 52.872          | 14.552          | 54.297          | 14.552          | 55.679          | 14.552          | 57.345          |
| 19.002          | 51.719          | 15.791          | 52.667          | 15.791          | 54.054          | 15.791          | 55.392          | 15.791          | 56.994          |
| 20.129          | 51.556          | 17.03           | 52.466          | 17.03           | 53.817          | 17.03           | 55.115          | 17.03           | 56.658          |
| 22.382          | 51.238          | 19.509          | 52.079          | 19.509          | 53.364          | 19.509          | 54.587          | 19.509          | 56.024          |
| 23.509          | 51.084          | 20.748          | 51.891          | 20.748          | 53.146          | 20.748          | 54.335          | 20.748          | 55.725          |
| 24.635          | 50.932          | 21.988          | 51.708          | 21.988          | 52.934          | 21.988          | 54.091          | 21.988          | 55.437          |
| 26.889          | 50.637          | 24.466          | 51.353          | 24.466          | 52.524          | 24.466          | 53.623          | 24.466          | 54.889          |
| 28.015          | 50.493          | 25.706          | 51.181          | 25.706          | 52.327          | 25.706          | 53.398          | 25.706          | 54.628          |
| 29.142          | 50.351          | 26.945          | 51.013          | 26.945          | 52.134          | 26.945          | 53.179          | 26.945          | 54.375          |
| 30.269          | 50.212          | 28.184          | 50.847          | 28.184          | 51.946          | 28.184          | 52.966          | 28.184          | 54.129          |
| 32.522          | 49.941          | 30.663          | 50.526          | 30.663          | 51.581          | 30.663          | 52.555          | 30.663          | 53.659          |
| 33.649          | 49.808          | 31.902          | 50.37           | 31.902          | 51.404          | 31.902          | 52.357          | 31.902          | 53.433          |
| 34.775          | 49.677          | 33.142          | 50.217          | 33.142          | 51.231          | 33.142          | 52.164          | 33.142          | 53.214          |
| 37.029          | 49.422          | 35.62           | 49.918          | 35.62           | 50.895          | 35.62           | 51.79           | 35.62           | 52.791          |
| 39.282          | 49.174          | 38.099          | 49.63           | 38.099          | 50.573          | 38.099          | 51.431          | 38.099          | 52.388          |
| 40.409          | 49.053          | 39.338          | 49.489          | 39.338          | 50.416          | 39.338          | 51.258          | 39.338          | 52.194          |
| 42.662          | 48.815          | 41.817          | 49.215          | 41.817          | 50.11           | 41.817          | 50.921          | 41.817          | 51.819          |
| 43.789          | 48.699          | 43.056          | 49.081          | 43.056          | 49.961          | 43.056          | 50.757          | 43.056          | 51.637          |
| 44.915          | 48.584          | 44.296          | 48.949          | 44.296          | 49.815          | 44.296          | 50.597          | 44.296          | 51.459          |
| 46.042          | 48.471          | 45.535          | 48.819          | 45.535          | 49.672          | 45.535          | 50.44           | 45.535          | 51.285          |
| 47.169          | 48.36           | 46.774          | 48.691          | 46.774          | 49.53           | 46.774          | 50.285          | 46.774          | 51.114          |
| 48.295          | 48.249          | 48.014          | 48.565          | 48.014          | 49.391          | 48.014          | 50.133          | 48.014          | 50.947          |
| 49.422          | 48.141          | 49.253          | 48.441          | 49.253          | 49.255          | 49.253          | 49.984          | 49.253          | 50.783          |
| 50.549          | 48.033          | 50.492          | 48.319          | 50.492          | 49.12           | 50.492          | 49.838          | 50.492          | 50.622          |
| 52.802          | 47.822          | 52.971          | 48.079          | 52.971          | 48.857          | 52.971          | 49.552          | 52.971          | 50.309          |
| 53.929          | 47.719          | 54.21           | 47.962          | 54.21           | 48.729          | 54.21           | 49.413          | 54.21           | 50.157          |
| 56.182          | 47.515          | 56.689          | 47.732          | 56.689          | 48.477          | 56.689          | 49.141          | 56.689          | 49.861          |
| 57.309          | 47.415          | 57.928          | 47.62           | 57.928          | 48.355          | 57.928          | 49.008          | 57.928          | 49.716          |
| 58.435          | 47.317          | 59.168          | 47.509          | 59.168          | 48.233          | 59.168          | 48.877          | 59.168          | 49.574          |
| 59.562          | 47.219          | 60.407          | 47.399          | 60.407          | 48.114          | 60.407          | 48.748          | 60.407          | 49.435          |

|        |        |        |        |        |        |        |        |        |        |
|--------|--------|--------|--------|--------|--------|--------|--------|--------|--------|
| 60.689 | 47.123 | 61.646 | 47.291 | 61.646 | 47.996 | 61.646 | 48.622 | 61.646 | 49.297 |
| 62.942 | 46.933 | 64.125 | 47.078 | 64.125 | 47.766 | 64.125 | 48.373 | 64.125 | 49.029 |
| 64.069 | 46.84  | 65.364 | 46.974 | 65.364 | 47.653 | 65.364 | 48.252 | 65.364 | 48.898 |
| 66.322 | 46.656 | 67.843 | 46.769 | 67.843 | 47.431 | 67.843 | 48.014 | 67.843 | 48.642 |
| 67.449 | 46.566 | 69.082 | 46.668 | 69.082 | 47.322 | 69.082 | 47.898 | 69.082 | 48.516 |
| 68.575 | 46.477 | 70.322 | 46.569 | 70.322 | 47.215 | 70.322 | 47.783 | 70.322 | 48.393 |
| 69.702 | 46.388 | 71.561 | 46.471 | 71.561 | 47.109 | 71.561 | 47.67  | 71.561 | 48.271 |
| 70.829 | 46.301 | 72.8   | 46.374 | 72.8   | 47.004 | 72.8   | 47.558 | 72.8   | 48.151 |
| 73.082 | 46.129 | 75.279 | 46.183 | 75.279 | 46.799 | 75.279 | 47.339 | 75.279 | 47.916 |
| 74.209 | 46.044 | 76.518 | 46.089 | 76.518 | 46.698 | 76.518 | 47.231 | 76.518 | 47.801 |
| 76.462 | 45.876 | 78.997 | 45.904 | 78.997 | 46.499 | 78.997 | 47.02  | 78.997 | 47.576 |
| 78.715 | 45.713 | 81.475 | 45.723 | 81.475 | 46.306 | 81.475 | 46.814 | 81.475 | 47.356 |
| 79.842 | 45.632 | 82.715 | 45.634 | 82.715 | 46.21  | 82.715 | 46.713 | 82.715 | 47.248 |
| 80.968 | 45.552 | 83.954 | 45.546 | 83.954 | 46.116 | 83.954 | 46.613 | 83.954 | 47.142 |
| 82.095 | 45.472 | 85.193 | 45.459 | 85.193 | 46.023 | 85.193 | 46.515 | 85.193 | 47.037 |
| 83.222 | 45.394 | 86.433 | 45.373 | 86.433 | 45.931 | 86.433 | 46.417 | 86.433 | 46.933 |
| 84.348 | 45.316 | 87.672 | 45.288 | 87.672 | 45.84  | 87.672 | 46.32  | 87.672 | 46.831 |
| 86.602 | 45.163 | 90.151 | 45.119 | 90.151 | 45.66  | 90.151 | 46.131 | 90.151 | 46.629 |
| 87.728 | 45.087 | 91.39  | 45.037 | 91.39  | 45.572 | 91.39  | 46.037 | 91.39  | 46.53  |
| 89.982 | 44.937 | 93.869 | 44.873 | 93.869 | 45.398 | 93.869 | 45.854 | 93.869 | 46.336 |
| 92.235 | 44.791 | 96.347 | 44.713 | 96.347 | 45.228 | 96.347 | 45.674 | 96.347 | 46.146 |
| 93.362 | 44.718 | 97.587 | 44.634 | 97.587 | 45.144 | 97.587 | 45.586 | 97.587 | 46.052 |
| 94.488 | 44.646 | 98.826 | 44.556 | 98.826 | 45.061 | 98.826 | 45.498 | 98.826 | 45.96  |
| 96.742 | 44.504 | 101.3  | 44.402 | 101.3  | 44.897 | 101.3  | 45.326 | 101.3  | 45.778 |
| 97.868 | 44.434 | 102.54 | 44.326 | 102.54 | 44.816 | 102.54 | 45.241 | 102.54 | 45.688 |
| 98.995 | 44.365 | 103.78 | 44.25  | 103.78 | 44.737 | 103.78 | 45.157 | 103.78 | 45.6   |
| 100.12 | 44.296 | 105.02 | 44.176 | 105.02 | 44.657 | 105.02 | 45.074 | 105.02 | 45.512 |
| 103.5  | 44.093 | 108.74 | 43.955 | 108.74 | 44.424 | 108.74 | 44.829 | 108.74 | 45.254 |
| 104.63 | 44.026 | 109.98 | 43.883 | 109.98 | 44.348 | 109.98 | 44.749 | 109.98 | 45.17  |
| 105.76 | 43.96  | 111.22 | 43.812 | 111.22 | 44.272 | 111.22 | 44.67  | 111.22 | 45.087 |
| 106.88 | 43.894 | 112.46 | 43.741 | 112.46 | 44.197 | 112.46 | 44.591 | 112.46 | 45.004 |

**Table S3:** The unit-cell volume ( $\text{\AA}^3$ ) of fcc Rh along several isotherms between 0–112 GPa was calculated using the fitted thermal equation of state (EoS) determined in this study, with parameters  $V_0 = 55.100(14) \text{\AA}^3$ ,  $K_0 = 251(2) \text{ GPa}$ ,  $K'_0 = 5.69(8)$ , and  $\alpha_0 = 2.28(4) \times 10^{-5} \text{ K}^{-1}$ . It should be noted that some of the reported volumes correspond to liquid Rh, as indicated by the melting line and melting point calculations presented in this work. Specifically, for the 3000 K isotherm, data points at pressures below approximately 28.6 GPa correspond to liquid Rh. Likewise, for the 4000 K isotherm, volumes reported at pressures below 73.7 GPa also correspond to the liquid phase.

### 3 CHEMICAL REACTION DURING LASER HEATING

*In situ* X-ray diagnostic of laser heating allows following, in real time, the transformations in the sample. These transformations include chemical reaction with its environment. We have observed a chemical reaction between rhodium and carbon migrating from diamond anvils, resulting in the formation of  $\text{Rh}_2\text{C}$  [2]. The chemical reaction was only observed with the use of KCl as PTM and was observed at temperature higher than the melting temperature of KCl. Peaks assigned to  $\text{Rh}_2\text{C}$  were detected after the diffuse signal coming from liquid KCl was observed (see top of figure S1).

The additional peaks highlighted in Fig. S1 (orange circles and arrows) are interpreted as arising from the formation of  $\text{Rh}_2\text{C}$ . These peaks are consistent with an orthorhombic  $Pmnn$  structure with unit-cell parameters  $a = 2.872 \text{ \AA}$ ,  $b = 4.374 \text{ \AA}$ , and  $c = 4.355 \text{ \AA}$ . This structure has been previously reported for  $\text{Rh}_2\text{C}$  at ambient conditions. Considering the experimental conditions ( $\sim 65 \text{ GPa}$  and temperatures up to  $\sim 4000 \text{ K}$ ), the extracted unit-cell parameters are in reasonable agreement with those reported at ambient pressure [2].

The most plausible explanation for the formation of  $\text{Rh}_2\text{C}$  is that upon melting of the KCl pressure-transmitting medium, carbon diffusion from diamonds likely occurred, leading to carbide formation under high  $P$ - $T$  conditions. Notably, this phenomenon was observed in only one heating ramp, and the amount of  $\text{Rh}_2\text{C}$  formed is limited, as evidenced in Fig. S1, especially when compared with more extensive carbide formation reported in other systems (e.g., TaC [3]).

This interpretation is further supported by the temperature evolution during the sequence of diffraction frames in which  $\text{Rh}_2\text{C}$  appears. In the first four frames, temperatures reach  $\sim 6000 \text{ K}$ . In frame 5, the temperature decreases to  $\sim 4500 \text{ K}$ , at which point the first diffraction peaks attributable to  $\text{Rh}_2\text{C}$  become visible (see corresponding integrated patterns and diffraction images). In subsequent frames, a further drop in temperature to  $\sim 3000 \text{ K}$  is observed, accompanied by the appearance of additional peaks associated with  $\text{Rh}_2\text{C}$  formation. These abrupt temperature drops may be linked to experimental instabilities, such as carbon diffusion processes or motion of molten KCl, both of which could perturb the heating conditions.

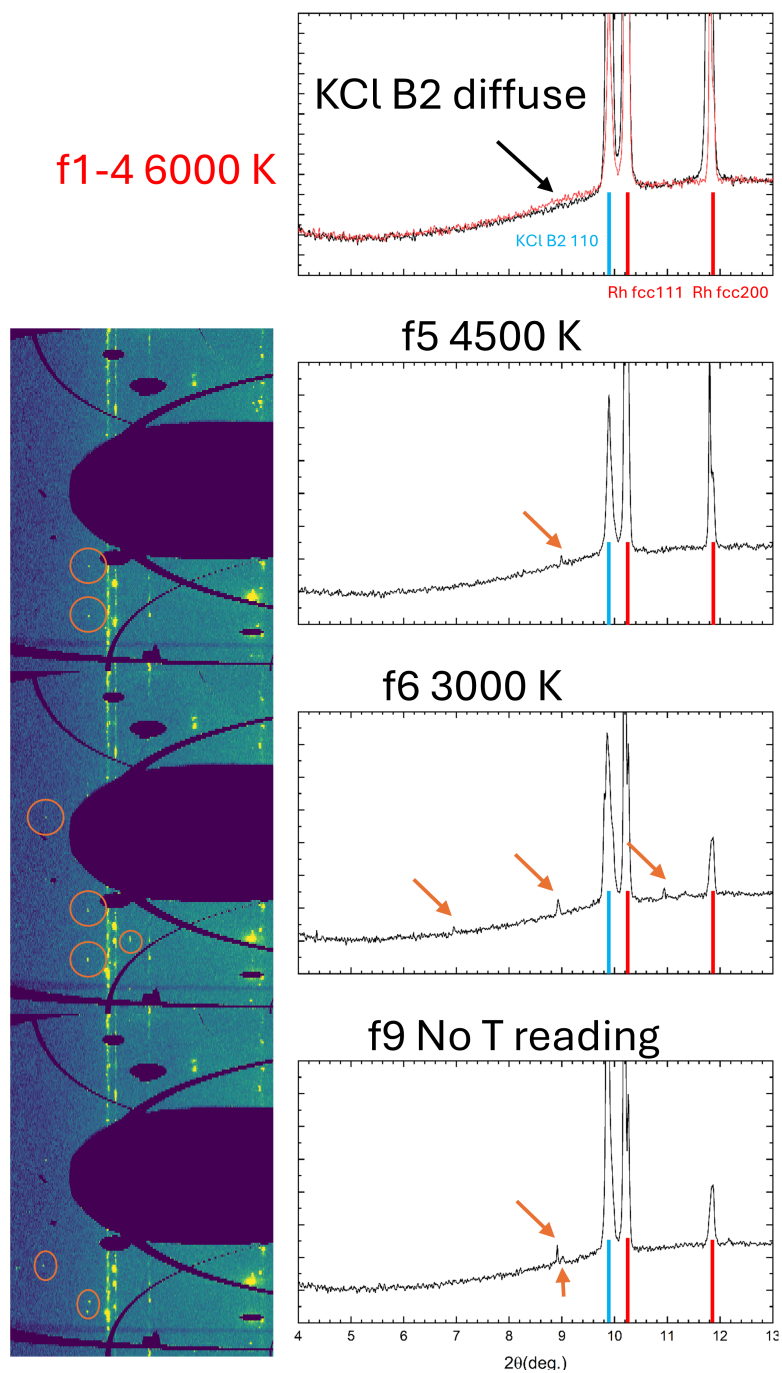

**Figure S1** Azimuthally unwrapped X-ray diffraction images (left) and integrated images (right) for selected heating steps where a reaction was identified. Bragg reflections for KCl and Rh are indicated by blue and red lines, respectively, while orange circles and arrows highlight the appearance of new single-crystal reflections associated with the formation of rhodium carbide (Rh<sub>2</sub>C).

## 4 MICROSTRUCTURAL ANALYSIS

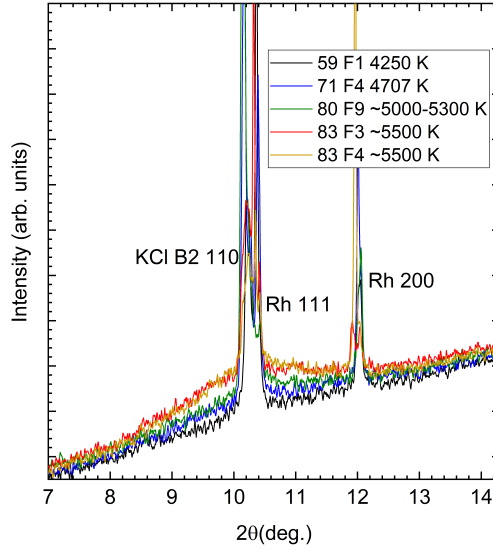

**Figure S2** Integrated XRD patterns collected upon increasing temperature at approximately 100 GPa. At 4250 K (black pattern), Rh remains in the solid phase. The onset of melting is observed at 4700 K (blue pattern). At higher temperatures (5000–5300K, green pattern), a clear increase in the diffuse signal is observed, indicating a larger fraction of liquid Rh. At even higher temperatures (5500K, red and yellow patterns), the diffuse scattering further increases, possibly reflecting the presence of a mixed liquid/solid KCl phase in addition to the Rh .

At very high pressures ( $\sim 100$  GPa), diffuse scattering is also observed. However, due to the proximity of the Bragg reflections (110) of KCl-B2 and (111) of *fcc* Rh, further analysis is required for unambiguous identification of the diffuse scattering origin. Figure S2 shows selected diffuse scattering patterns collected around 100 GPa. The close spacing of these Bragg peaks complicates the determination of the origin of the diffuse halo, as also reported in other studies[4].

A first analysis suggests that the initial diffuse signal corresponds to rhodium, as it is bounded toward its Bragg peak (blue and green lines in Fig.S2), indicating a melting locus around 4700-5000 K. Furthermore, examining the evolution of the diffuse halo with increasing temperature (yellow and red lines in Fig.S2) shows a more pronounced growth on the left side, near the KCl-B2 (110) reflection. This behavior suggests that at higher temperatures ( $\sim 5500$  K), KCl also melts, in agreement with the proposed melting line.

As discussed by Hrubciak *et al.*[5], melting can be identified by tracking microstructural changes in grain size in rapidly quenched samples in the LH-DAC. Therefore, microstructural analysis provides a reliable criterion for detecting melting, provided that the quenching rate is sufficiently fast. In this study, we employed this approach as an additional method for melt detection, complementing the identification based on diffuse scattering, which itself is a robust indicator of melting.

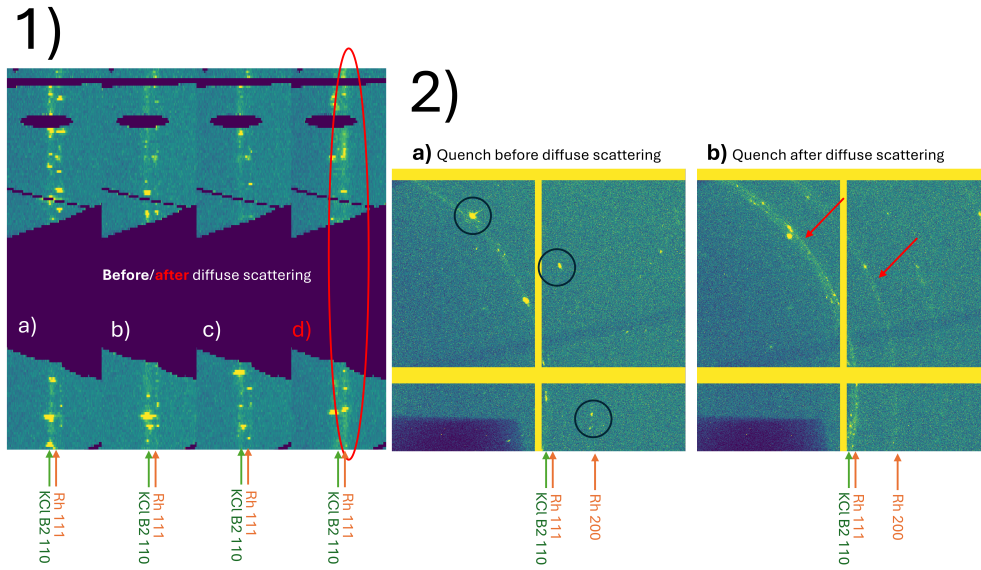

**Figure S3** **Left)** Azimuthally unwrapped X-ray diffraction images of quenched rhodium at  $\sim 100$  GPa. (a)–(c) Samples quenched from temperatures below the onset of diffuse scattering, showing grainy and discontinuous Rh diffraction features indicative of grain growth. (d) Sample quenched after the appearance of diffuse scattering, exhibiting continuous Rh diffraction features characteristic of a fine-grained microstructure. **Right)** Selected regions of 2D X-ray diffraction images of quenched rhodium. (a) Example prior to the observation of diffuse scattering, with large, well-defined Rh diffraction spots (black circles). (b) Example after diffuse scattering, showing the emergence of continuous Debye rings and the disappearance of discrete diffraction spots, indicating melting during the preceding heating stage.

After the observation via *in situ* X-ray of diffuse scattering, a fine-grained texture and continuous Debye rings are observed in the quenched images, in contrast to the more single-crystal-like spots present at lower temperatures. Figure S3 shows representative examples at  $\sim 100$  GPa. While the *in situ* diffuse scattering indicates that either KCl, Rh, or both may be molten during heating, quench analysis is required to unambiguously determine the origin of the diffuse signal.

The left panel of Fig. S3 presents a sequence of quenched cake images obtained at different heating stages. The rightmost image corresponds to the quench following the appearance of a diffuse ring at  $\sim 5000$  K. A clear transition in texture is observed: earlier quenches show features consistent with grain growth, whereas the post-melting quench exhibits a fine-grained microstructure. The right panel further illustrates this transition through selected 2D diffraction images. Together, these observations provide unambiguous confirmation that diffuse scattering originates from molten rhodium.

## 5 MELTING SIMULATIONS

Our quantum molecular dynamics (QMD) melting simulations were carried out using the Z method implemented with VASP. The Z-method is a procedure for the calculation of the melting curves of materials by modeling a solid system at different initial total energies. The idea of the method was put forward by Belonoshko *et al.* in Ref.[6]. A solid system is modeled in a NVE ensemble ( $N$  is the number of atoms, and  $V$  and  $E$  are the volume and total energy of the system, respectively). In each simulation  $E$  is controlled by the corresponding choice of the initial  $T$ . Essentially, the Z method simulates a solid in a superheated limit. The solid will melt spontaneously if the simulation is long enough, and  $T$  will drop to  $T_m$  (at  $P = P_m$ .) The shape of the  $P$ - $T$  trajectory mapped out by the final states of simulations with different initial  $T$ s resembles the letter Z, which is how the method got its name. After the original study of melting (of Pb) in the limit of solid superheating [7], the method has evolved into a well established scientific methodology. In fact, the Z method has been used in numerous studies of melting curves, e.g., of Fe and Fe-Si alloy [8], Zn [9], Sn [10], and Pt [11], just to name a few. The practical implementation of the Z method can be found in Refs.[6, 12, 13].

We have obtained the theoretical melting curve of fcc-Rh using the Z method implemented with VASP, as discussed above. For our study we used a 500-atom ( $5 \times 5 \times 5$ ) supercell. For such a large system, full energy convergence, to  $\lesssim 1$  meV/atom, was achieved already with a single  $\Gamma$ -point, as our tests clearly demonstrate. A time step of 1 fs was used. Runs of as long as 30000 time steps, or 30 ps, were carried out. We simulated eight melting points of fcc-Rh, by performing an average of five computer runs per point (for a total of  $\sim 40$  computer runs). Our results are summarized in Table S4. The errors in melting  $T$  ( $T_m$ ) are half of the increment of the initial  $T$  for a series of computer runs at the corresponding density [13]. We chose these increments to be 250 K for the first, 312.5 K for the second, 500 K for the third, 625 K for both the fourth and fifth, 750 K for the sixth, 1000 K for the seventh, and 1250 K for the eighth point, in the order of increasing density. The corresponding  $T_m$  errors are listed in Table S4 as  $\Delta T_m$ . The errors in melting  $P$  ( $P_m$ ) are negligibly small, of order 1-2 GPa in each case.

| lattice constant (Å) | density (g/cm <sup>3</sup> ) | $P_m$ (GPa) | $T_m$ (K) | $\Delta T_m$ (K) |
|----------------------|------------------------------|-------------|-----------|------------------|
| 4.000                | 10.680                       | -18.6       | 1110      | 125.0            |
| 3.800                | 12.457                       | 24.5        | 3210      | 156.3            |
| 3.650                | 14.056                       | 80.6        | 4820      | 250.0            |
| 3.500                | 15.942                       | 172         | 6730      | 312.5            |
| 3.375                | 17.859                       | 297         | 8770      | 312.5            |
| 3.250                | 19.911                       | 492         | 11330     | 375.0            |
| 3.150                | 21.868                       | 727         | 13860     | 500.0            |
| 3.075                | 23.508                       | 970         | 16110     | 625.0            |

**Table S4** Eight *ab initio* melting points of fcc-Rh, ( $P_m, T_m \pm \Delta T_m$ ), obtained using the Z-method implemented in VASP.

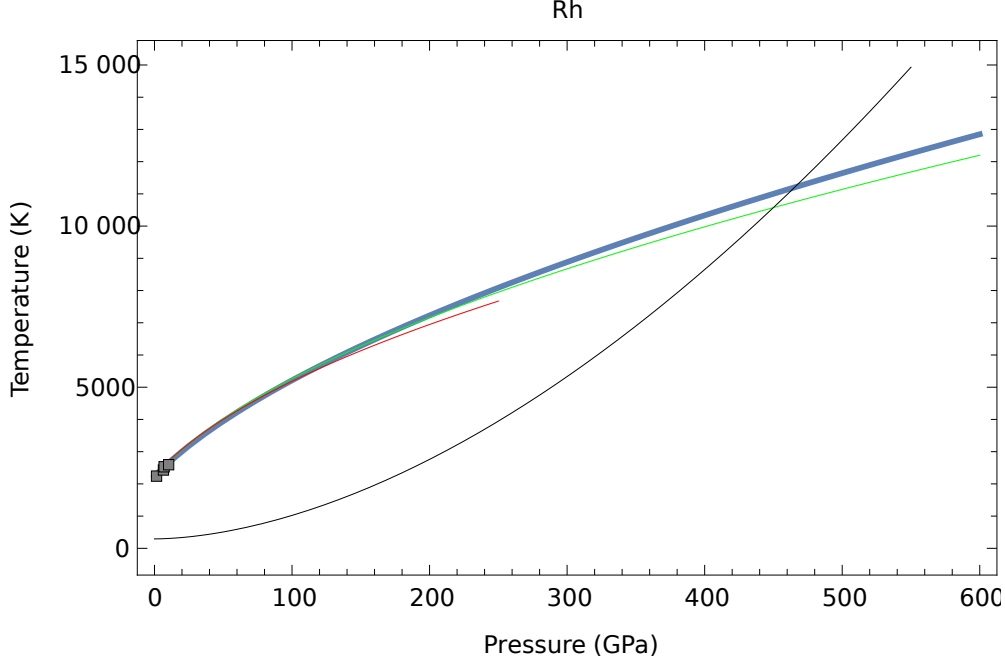

**Figure S4** The melting curve of Rh: comparison of the QMD results of this work described by Eq. (1) (blue curve) to the low- $P$  experimental data of Ref. [17] (boxes) as well as the theoretical results of Refs.[15] and [16] (green and red curves, respectively).

The best fit of the Simon-Glatzel form ( $T_m(P) = T_m(0)(1 + P/a)^b$ ) to the eight QMD datapoints of Table represents the corresponding melting curve:

$$T_m^{\text{fcc-Rh}}(P) = 2237.0 \left( 1 + \frac{P}{25.7} \right)^{0.54}, \quad (1)$$

which is our theoretical melting curve of rhodium. For this melting curve, the initial slope is 47.0 K/GPa, in excellent agreement with the thermodynamically based  $45 \pm 16$  K/GPa [14]. In Fig. this melting curve is compared to another two theoretical melting curves of Rh available in the literature, namely, those of Refs. [15] and [16]. Fig. also shows the principal Hugoniot of Rh that we calculated ( $T$  in K,  $P$  in GPa):  $T_H(P) = 293 + 0.22 \cdot P^{1.76}$ . The Hugoniot crosses the melting point at  $(P, T) = (465 \text{ GPa}, 11200 \text{ K})$  which is the shock melting point of Rh. Note that our value is in excellent agreement with (470 GPa, 10800 K) of Ref.[15].

## 6 THERMAL EQUATION OF STATE OF LIQUID Rh

For the calculation of the thermal equation of state (EOS) of liquid Rh, we used liquid configurations which resulted in our QMD Z-method runs. In other words, we used

liquid configurations of 500 atoms in a cubic computational box. Since the PBEsol implementation of DFT is intended for the application to solids but presumably not to liquids, its PBE implementation was used instead. Direct comparison of the results produced using PBE, PBEsol, and several other DFT implementations such as AM05 (Armiento-Mattsson for GGA) revealed that indeed PBE outperforms all the rest. More specifically, with the use of PBE, the equilibrium density ( $\rho$ ) of liquid Rh at the ambient melting point turns out to be 10.72 g/cm<sup>3</sup>, in essential agreement with  $10.82 \pm 0.22$  g/cm<sup>3</sup> from experiment [18], while the values which result from using different DFT implementations appear to be further away. Note that the value of  $\rho(P = 0)$  (that is,  $\rho(T_m = 2236$  K) that comes from the interpolation of the melting data in Table is 10.54 g/cm<sup>3</sup>. A 1.5% difference between 10.54 and 10.72 must come from the fact that the melting data in Table are obtained using PBEsol while 10.72 is based on PBE.

The finite- $T$  simulations of the thermal equation of state (EOS) were carried out using the algorithm of Nosé (SMASS=0 in VASP) in which during a QMD run with fixed volume (or fixed density,  $\rho$ ) both  $T$  and  $P$  undergo controlled oscillations around, respectively,  $T$  chosen for the run and equilibrium  $P_{\text{eq}}$  the value of which is assigned to the corresponding  $(\rho, T)$ . For these simulations, used liquid configurations which resulted in our QMD Z-method runs. In other words, we used liquid configurations of 500 atoms in a cubic computational box. As before, a single  $\Gamma$ -point was used. We performed 5 QMD runs at a series of fixed  $T$  from 3000 K to 5000 K with an increment of 500 K at 5 different system volumes that correspond to  $P \sim 0 - 100$  GPa, and 5 QMD runs at a series of fixed  $T$  from 5000 K to 7000 K with an increment of 500 K at 5 different system volumes that correspond to  $P \sim 100 - 250$  GPa, for a total of 50 QMD runs of liquid Rh. The duration of each of the 50 runs was 15000 time steps with a time step of 1 fs, that is, 15 ps. In QMD runs performed for the calculation of radial distribution functions (RDFs) of liquid Rh at given  $(P, T)$ , RDFs were dumped over the last 5000 time steps, or the last 5 ps of running time.

We assume that the thermal EOS is of the form

$$P(\rho, T) = P(\rho, T_{\text{ref}}) + C(T - T_{\text{ref}}), \quad (2)$$

where  $T_{\text{ref}}$  is a reference point which is convenient to choose to be the ambient  $T_m = 2236$  K. Typically, for a solid  $C = (\alpha B_T)$ , where  $\alpha$  and  $B_T$  are, respectively, the thermal expansion coefficient and isothermal bulk modulus the product of which is assumed to be independent of  $T$ . For liquid, we do not associate  $C$  with the product  $\alpha B_T$  but consider it as a free parameter the value of which comes from fitting the above functional form to the data, either experimental or numerical, or both. Fitting the results of our calculations (using PBE) with the 3rd-order Birch-Murnaghan (BM3) EOS of the form (in the following  $B$  and  $B'$  stand for bulk modulus (in GPa) and its pressure derivative, respectively, and the subscript  $m$  means  $(T = T_m, P = 0)$ )

$$P(\rho, T_m) = \frac{3}{2} B_m \left( \eta^{7/3} - \eta^{5/3} \right) \left[ 1 + \frac{3}{4} (B'_m - 4) \left( \eta^{2/3} - 1 \right) \right], \quad (3)$$

where  $\eta \equiv \rho/\rho_m$ , results in the following sets of parameters for liquid fcc-Rh:

$$\rho_m = 10.72 \text{ g/cm}^3, \quad B_m = 142.5 \text{ GPa}, \quad B'_m = 5.6, \quad C = 8.5 \cdot 10^{-3} \text{ GPa K}^{-1}.$$

## 7 LIQUID RHODIUM ANALYSIS

The structure of liquid rhodium was analysed using the AMORPHEUS Python code [19] in order to extract the radial distribution function  $g(r)$  and atomic density at three different P-T conditions. Specifically the XRD signal from the liquid  $I_{\text{sample}}(Q)$  was obtained by subtracting the last XRD solid image before melting  $I_{\text{bkg}}(Q)$  to the one that contains the signal from the liquid  $I_{\text{meas}}(Q)$ . Masks were applied using DIOPTAS [20] in order to remove, as much as possible, the signal from the solid phases present in the XRD patterns. The data were subsequently processed using the RPS functionality implemented in AMORPHEUS, which allows peak removal [19]. Then the sample's signal was obtained by removing the contribution from the environment as  $I_{\text{sample}}(Q) = I_{\text{meas}}(Q) - b * I_{\text{bkg}}(Q)$ .  $b$  is a factor for the background correction, an adimensional parameter that was optimized during the analysis. The structure factor  $S(Q)$  and  $F(r)$  were obtained from the  $I_{\text{sample}}(Q)$ . The density of the liquid and  $g(r)$  were obtained by minimizing the figure of merit  $\chi^2(r_{\text{min}}, b, Q_{\text{max}}, \rho) = \int_0^{r_{\text{min}}} [\Delta F(r)]^2 dr$  i.e. minimization at a low distance on the obtained X-ray weighted radial distribution function. The global analysis is performed after 5 iterations, for the removal of the noise at low  $r$ . Final  $g(r)$  is obtained by applying a Lorch modification function. The data shown here were obtained using  $Q_{\text{max}}$  values between 60 and 80  $\text{nm}^{-1}$ . In order to obtain the most reliable values, the experimental  $g(r)$  functions were compared with those simulated using the PBE functional. The results are shown in Fig.S5. It can be seen that the experimental analysis led to a good minimization, since  $g(r)$  approaches zero for  $r < r_{\text{min}}$ . In addition, the experimental radial distribution functions reproduce the simulated ones to a reasonable extent. The largest discrepancy is observed for the radial distribution function at 39 GPa.

Uncertainties in the density determination arise from several factors. The effect of  $Q_{\text{max}}$  was also investigated in order to estimate the associated errors in the determined density. Truncation effects for  $Q_{\text{max}}$  values around 70–80  $\text{nm}^{-1}$ , which are typical for LH-DAC experiments and correspond to the values used here, are limited to within  $\pm 2.0$  atoms/ $\text{nm}^3$  [21].

The atomic density is also highly sensitive to the choice of  $r_{\text{min}}$ . The reliability of the obtained  $r_{\text{min}}$  values can be assessed through analysis of the pair correlation function, since this parameter should coincide with the onset of the first coordination shell in  $g(r)$ , which is fulfilled in our case (see Fig.S5). Typical uncertainties of  $\pm 3$  atoms/ $\text{nm}^3$  are generally assigned for LH-DAC experiments with  $Q_{\text{max}} < 80 \text{ nm}^{-1}$  [21]. In this experiment we have assigned values of errors for the density of  $\pm 3 - 4.5$  atoms/ $\text{nm}^3$  by inspection of the figure of merit  $\chi^2$  as a function of the mentioned parameters  $r_{\text{min}}, b, Q_{\text{max}}$ .

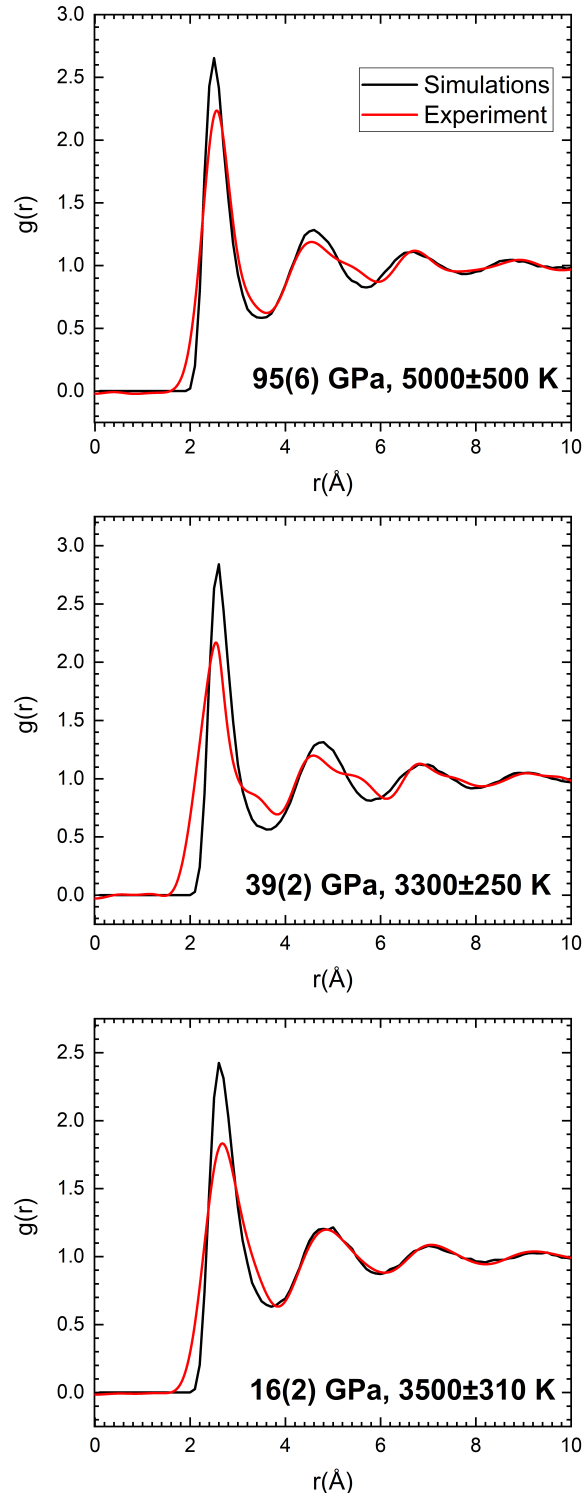

**Figure S5** Radial distribution functions obtained at three different P-T conditions for liquid Rh compared with the simulated ones using PBE

## 8 TEMPERATURE MEASUREMENTS

The LH-DAC experiments were performed using laser-heating (LH) systems installed at the extreme conditions beamlines I15 at Diamond Light Source and ID27 at ESRF. A detailed description of the I15 setup is provided in Anzellini *et al.* [22], while the ID27 system is described in Mezouar *et al.* [23]. For completeness, schematic representations of both systems are shown in Supplementary Figures S6 and S7.

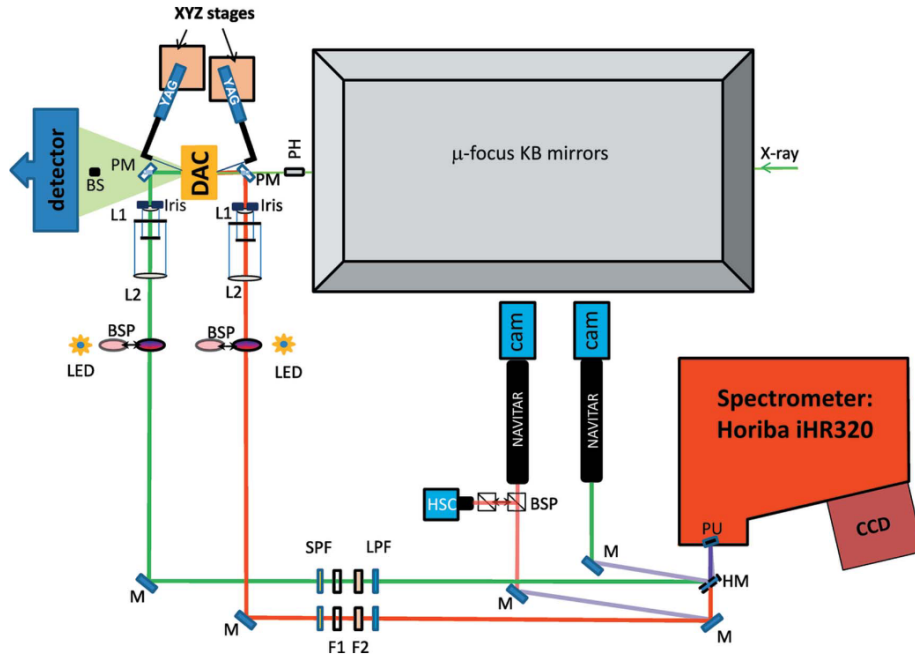

**Figure S6** Schematics of the laser-heating system used on the I15 beam-line: Red and green lines represent the down and up-stream optical paths, respectively. The various components abbreviations are as follows: BS: beam-stop; L: lens; YM: YAG mirror; PH: pinhole; PM: Perforated mirror; BSP: Removable beam-splitter for LED illumination of the sample; M: mirror; SPF: Short-pass filter; LPF: Long-pass filter; F1 and F2: Neutral density filters; HM: Half mirror; PU: perforated mirror at the entrance of the spectrometer. Image extracted from [22]

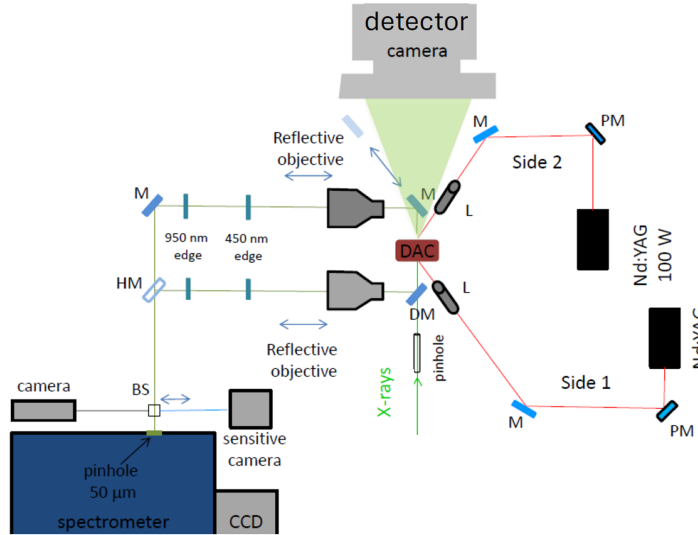

**Figure S7** Schematic of the experimental setup of the beamline ID27 as reported in the PhD thesis S. Anzellini[24] In the figure M: Mirror, PM: polarizes mirror, HM: half mirror, L: lens

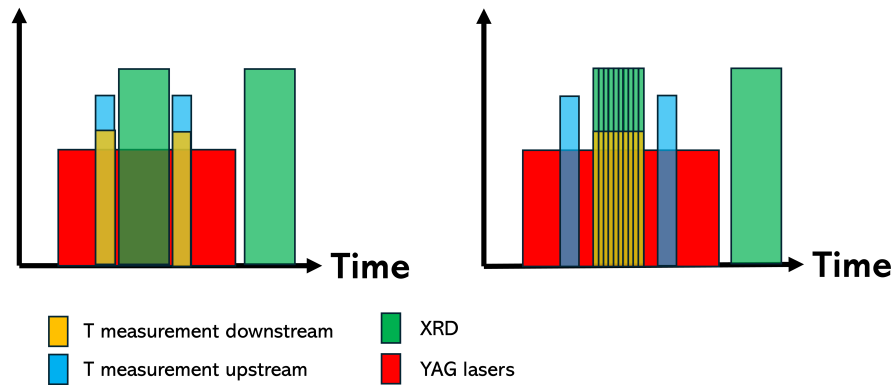

**Figure S8** Schematic comparison of the data acquisition protocols. **Left:** Standard “trigger mode” at Diamond Light Source. **Right:** Modified protocol implemented at the ID27 beamline (ESRF).

In these experiments, temperature was determined using spectral radiometry. Thermal emission from the sample surface was collected through either refractive or reflective optics, depending on the configuration, and focused onto the entrance slit of an optical spectrometer. The optical path was calibrated using a tungsten lamp as a temperature standard, after which the thermal radiation emitted by the laser-heated hotspot was recorded.

Temperature determination in diamond anvil cell experiments via spectroradiometry can involve significant uncertainties, particularly at very high temperatures. The main source of error arises from the unknown wavelength dependence of the sample emissivity; in this work, emissivity is assumed to be constant (gray-body approximation). Additionally, due to the Gaussian temperature distribution of the laser-heated spot, the collected signal may represent a contribution of different local temperatures.

To account for these uncertainties, temperature errors were evaluated by comparing Planck fits with two-color pyrometry fits, following the approach described by Benedetti and Loubeyre [25]. Temperatures were extracted from Planck fits within a wavelength range  $\geq 250$  nm, where the two-color signal is approximately constant (see Figure S9).

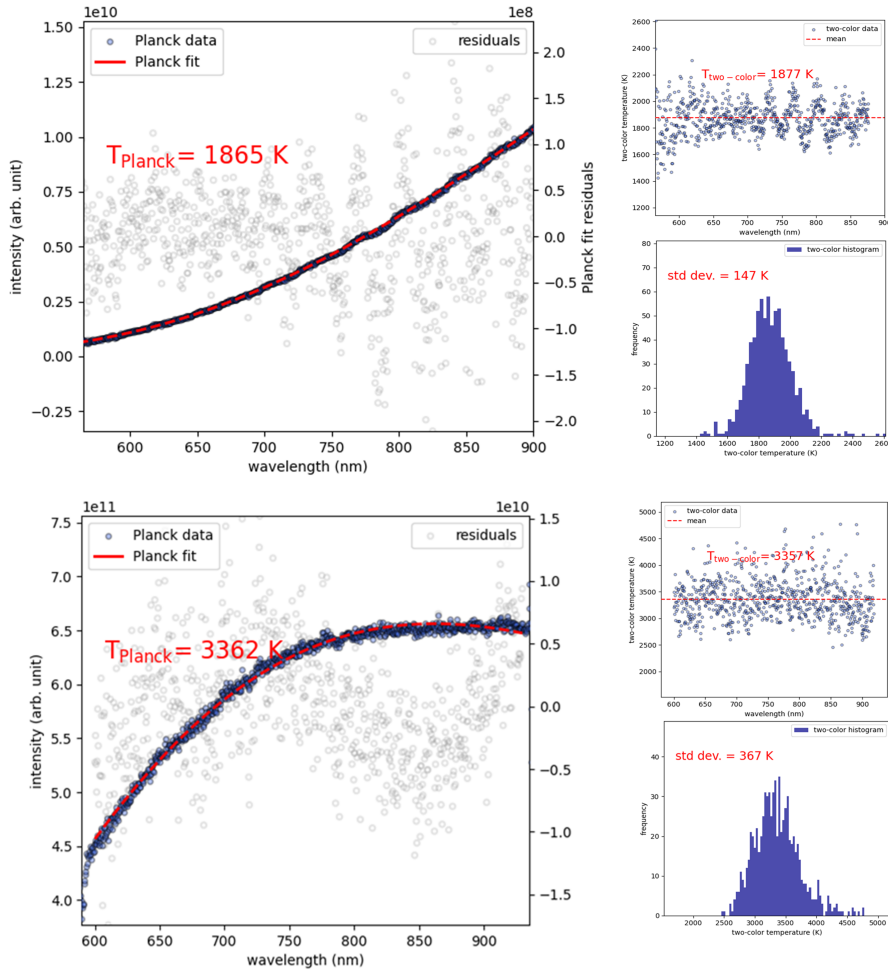

**Figure S9** Example of Planck fit, in red, at 1865 K and 3362 K. In the right panel the two color fits are shown with the mean temperature in red dashed line. The histograms represent the variance of the distribution of temperatures around the mean value in the two-color plot.

For each heating step (i.e., constant laser power), the temperature was calculated as the average of all valid measurements. Individual measurement uncertainties were estimated as the standard deviation obtained from the two-color fit. The final uncertainty assigned to each heating step corresponds to the larger value between: (i) the standard deviation of the two-color fits, and (ii) the spread between individual temperature measurements.

To further assess the reliability of the temperature measurements, the temporal stability of the system was analyzed for the ESRF experiments. For each measurement, two upstream (*ex situ*) and ten downstream (*in situ*) temperature readings were collected. For each heating ramp and step, the mean temperature  $T_{\text{mean}}$  was calculated using all valid measurements (excluding those affected by detector saturation or poor signal quality). The temperature variation within each step,  $\Delta T$ , was defined as the difference between the maximum and minimum recorded temperatures.

The temperature difference  $\Delta T$  (typically 50–100 K) is generally smaller than the uncertainty associated with the two-color fit (150–500K) at lower temperatures (up to 2500 K approximately), as shown in Figure S10. As expected, the difference increases with temperature. While at lower temperatures we observe that the temperature variation within different short time measurements is extremely small it increases as we reach higher T's, specifically about 3000 K, this could be due to changes in the pressure transmitting medium thermal conductivity or changes in the emissivity of the metal studied at high temperature.

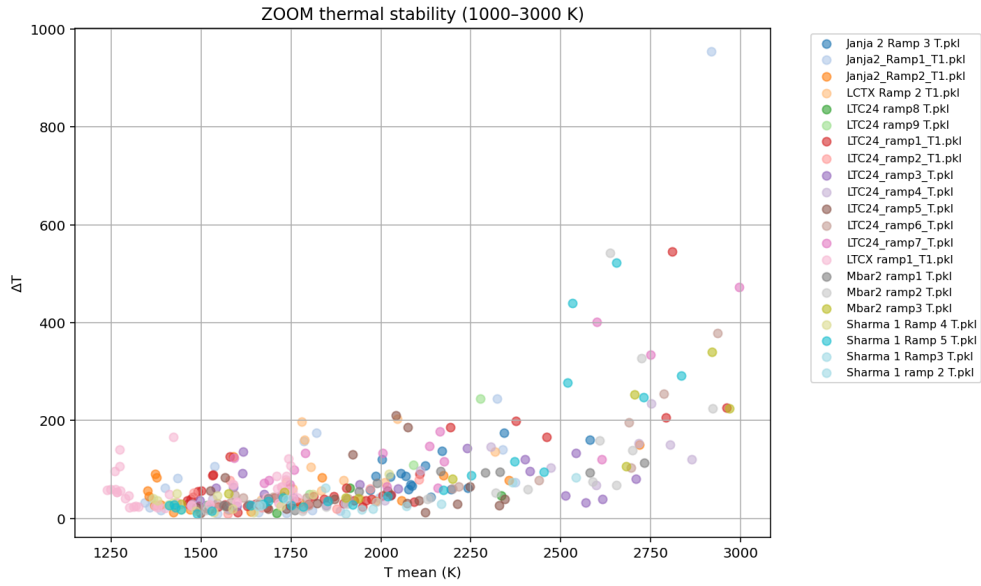

**Figure S10** Temperature difference  $\Delta T$  versus mean temperature for different LH heating ramps up to 3000 K.

## References

- [1] Dorogokupets, P.I.: P–v–t equations of state of mgo and thermodynamics. *Physics and Chemistry of Minerals* **37**(9), 677–684 (2010) <https://doi.org/10.1007/s00269-010-0367-2>
- [2] Wakisaka, T., Kusada, K., Wu, D., Yamamoto, T., Toriyama, T., Matsumura, S., Akiba, H., Yamamuro, O., Ikeda, K., Otomo, T., Palina, N., Chen, Y., Kumara, L.S.R., Song, C., Sakata, O., Xie, W., Koyama, M., Kubota, Y., Kawaguchi, S., Arevalo, R.L., Aspera, S.M., Arguelles, E.F., Nakanishi, H., Kitagawa, H.: Rational synthesis for a noble metal carbide. *Journal of the American Chemical Society* **142**(3), 1247–1253 (2020) <https://doi.org/10.1021/jacs.9b09219>
- [3] Dewaele, A., Mezouar, M., Guignot, N., Loubeyre, P.: High melting points of tantalum in a laser-heated diamond anvil cell. *Phys. Rev. Lett.* **104**, 255701 (2010) <https://doi.org/10.1103/PhysRevLett.104.255701>
- [4] Anzellini, S., Herlihy, A., Dominijanni, S., Botella, P., Brooks, A., Burakovsky, L., Pakhomova, A., Errandonea, D.: Phase diagram of ruthenium characterized in situ by synchrotron x-ray diffraction and ab initio simulations. *Results in Physics* **65**, 107961 (2024) <https://doi.org/10.1016/j.rinp.2024.107961>
- [5] Hrubiak, R., Meng, Y., Shen, G.: Microstructures define melting of molybdenum at high pressures. *Nature Communications* **8**(1), 14562 (2017) <https://doi.org/10.1038/ncomms14562>
- [6] Belonoshko, A.B., Skorodumova, N.V., Rosengren, A., Johansson, B.: Melting and critical superheating. *Phys. Rev. B* **73**, 012201 (2006) <https://doi.org/10.1103/PhysRevB.73.012201>
- [7] Cricchio, F., Belonoshko, A.B., Burakovsky, L., Preston, D.L., Ahuja, R.: High-pressure melting of lead. *Phys. Rev. B* **73**, 140103 (2006) <https://doi.org/10.1103/PhysRevB.73.140103>
- [8] Belonoshko, A.B., Rosengren, A., Burakovsky, L., Preston, D.L., Johansson, B.: Melting of fe and  $\text{fe}_{0.9375}\text{si}_{0.0625}$  at earth’s core pressures studied using ab initio molecular dynamics. *Phys. Rev. B* **79**, 220102 (2009) <https://doi.org/10.1103/PhysRevB.79.220102>
- [9] Errandonea, D., MacLeod, S.G., Ruiz-Fuertes, J., Burakovsky, L., McMahon, M.I., Wilson, C.W., Ibañez, J., Daisenberger, D., Popescu, C.: High-pressure/high-temperature phase diagram of zinc. *Journal of Physics: Condensed Matter* **30**(29), 295402 (2018) <https://doi.org/10.1088/1361-648X/aacac0>
- [10] Rehn, D.A., Greeff, C.W., Burakovsky, L., Sheppard, D.G., Crockett, S.D.: Multiphase tin equation of state using density functional theory. *Phys. Rev. B* **103**, 184102 (2021) <https://doi.org/10.1103/PhysRevB.103.184102>

- [11] Burakovsky, L., Preston, D.L., Errandonea, D.: Ab initio study of randomly disordered hexagonal close-packed (rhcp) phase in platinum. *Journal of Applied Physics* **137**(1), 015109 (2025) <https://doi.org/10.1063/5.0235811>
- [12] Burakovsky, L., Chen, S.P., Preston, D.L., Sheppard, D.G.: Z methodology for phase diagram studies: platinum and tantalum as examples. *Journal of Physics: Conference Series* **500**(16), 162001 (2014) <https://doi.org/10.1088/1742-6596/500/16/162001>
- [13] Burakovsky, L., Burakovsky, N., Preston, D.L.: Ab initio melting curve of osmium. *Phys. Rev. B* **92**, 174105 (2015) <https://doi.org/10.1103/PhysRevB.92.174105>
- [14] Arblaster, J.W.: Selected values for the densities and molar volumes of the liquid platinum group metals and of the initial melting curves of iridium, rhodium and ruthenium. *Johnson Matthey Technology Review* **61**(2), 80–86 (2017) <https://doi.org/10.1595/205651317X694461>
- [15] Smirnov, N.A.: Ab initio calculations of structural stability, thermodynamic and elastic properties of ni, pd, rh, and ir at high pressures. *Journal of Applied Physics* **134**(2), 025901 (2023) <https://doi.org/10.1063/5.0158737>
- [16] Tam, N.T., Lam, L.T., Hieu, H.K.: Investigation of equation-of-state and melting behavior of rhodium up to 200 gpa. *Physics Letters A* **543**, 130450 (2025) <https://doi.org/10.1016/j.physleta.2025.130450>
- [17] Strong, H.M., Bundy, F.P.: Fusion curves of four group viii metals to 100 000 atmospheres. *Phys. Rev.* **115**, 278–284 (1959) <https://doi.org/10.1103/PhysRev.115.278>
- [18] Paradis, P.-F., Ishikawa, T., Yoda, S.: Thermophysical property measurements of supercooled and liquid rhodium. *International Journal of Thermophysics* **24**(4), 1121–1136 (2003) <https://doi.org/10.1023/A:1025065304198>
- [19] Boccato, S., Garino, Y., Morard, G., Zhao, B., Xu, F., Sanloup, C., King, A., Guignot, N., Clark, A., Garbarino, G., Morand, M., Antonangeli, D.: Amorpheus: a python-based software for the treatment of x-ray scattering data of amorphous and liquid systems. *High Pressure Research* **42**(1), 69–93 (2022) <https://doi.org/10.1080/08957959.2022.2032032>
- [20] Prescher, C., Prakapenka, V.B.: Dioptas: a program for reduction of two-dimensional x-ray diffraction data and data exploration. *High Pressure Research* **35**(3), 223–230 (2015) <https://doi.org/10.1080/08957959.2015.1059835>
- [21] Morard, G., Garbarino, G., Antonangeli, D., Andrault, D., Guignot, N., Siebert, J., Roberge, M., Boulard, E., Lincot, A., Denoeud, A., Petitgirard, S.: Density measurements and structural properties of liquid and amorphous metals under high pressure. *High Pressure Research* **34**(1), 9–21 (2014) <https://doi.org/10.1080/08957959.2014.904444>

- [22] Anzellini, S., Kleppe, A.K., Daisenberger, D., Wharmby, M.T., Giampaoli, R., Boccato, S., Baron, M.A., Miozzi, F., Keeble, D.S., Ross, A., Gurney, S., Thompson, J., Knap, G., Booth, M., Hudson, L., Hawkins, D., Walter, M.J., Wilhelm, H.: Laser-heating system for high-pressure x-ray diffraction at the extreme conditions beamline i15 at diamond light source. *Journal of Synchrotron Radiation* **25**(6), 1860–1868 (2018) <https://doi.org/10.1107/S1600577518013383>
- [23] Mezouar, M., Garbarino, G., Bauchau, S., Morgenroth, W., Martel, K., Petitdemange, S., Got, P., Clavel, C., Moyne, A., Kleij, H.-P.V.D., Pakhomova, A., Wehinger, B., Gerin, M., Poreba, T., Canet, L., Rosa, A., Forestier, A., Weck, G., Datchi, F., Wilke, M., Jahn, S., Andrault, D., Libon, L., Pennacchioni, L., Kovalskii, G., Herrmann, M., Laniel, D., Bureau, H.: The high flux nano-x-ray diffraction, fluorescence and imaging beamline id27 for science under extreme conditions on the esrf extremely brilliant source. *High Pressure Research* **44**(3), 171–198 (2024) <https://doi.org/10.1080/08957959.2024.2363932>
- [24] Anzellini, S.: Phase diagram of iron under extreme conditions measured with time resolved methods. Ph.d. thesis, Université Pierre et Marie Curie-Paris VI, Paris, France (2014)
- [25] Benedetti, L.R., Loubeyre, P.: Temperature gradients, wavelength-dependent emissivity, and accuracy of high and very-high temperatures measured in the laser-heated diamond cell. *High Pressure Research* **24**(4), 423–445 (2004) <https://doi.org/10.1080/08957950412331331718>
